# Supplementary material
Source: Springer Nature journal article supplement (https://www.springermedizin.de/resource/supplementary/12906_2011_460_MOESM3_ESM.pdf/9519538)

**A****Hydrogen peroxide**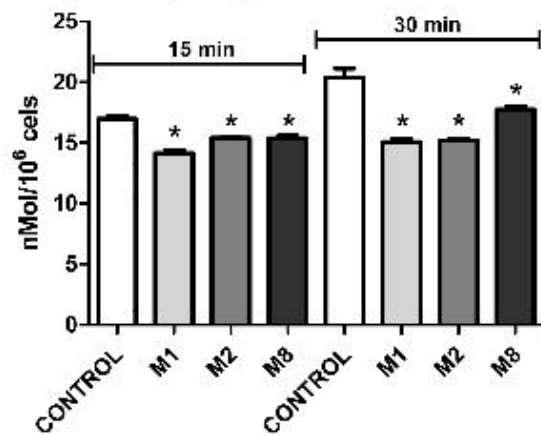**B****Superoxide anion**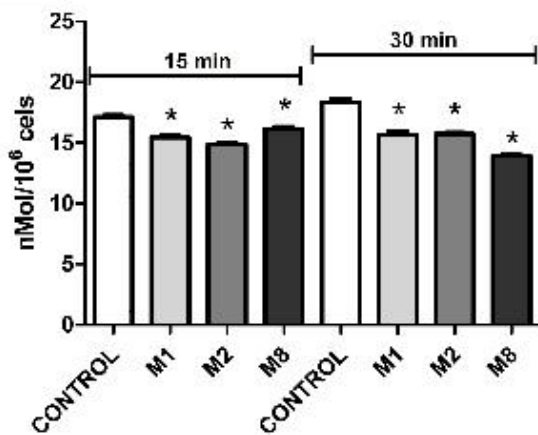**C****NO production**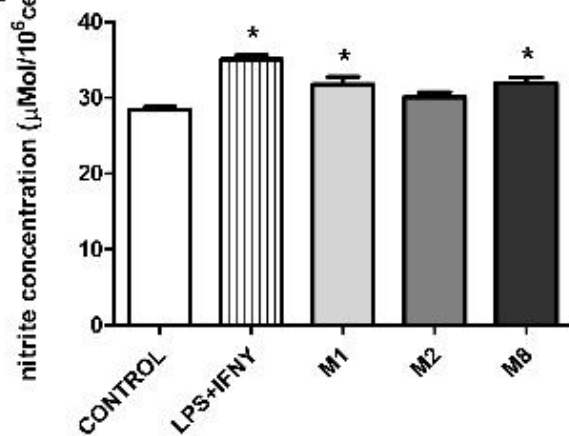

Supplement: MOESM3 [file 9519538]
